# Supplementary material for: Effect of supporting electrolyte on capacitance and morphology of electrodeposited poly(3,4-propylenedioxythiophene) derivatives bearing reactive functional groups
Source: Royal Society of Chemistry journal article supplement (doi:10.1039/d1me00171j), 2022-01-01
Supplement: d1me00171j1.pdf [file d1me00171j1.pdf]

## Supplementary Material

### Electrolyte Effect on the Electrochemistry of Doping of PProDOT derivatives

Baran Sarac, Tolga Karazehir, Hans-Detlev Gilsing, Jürgen Eckert, and A. Sezai Sarac

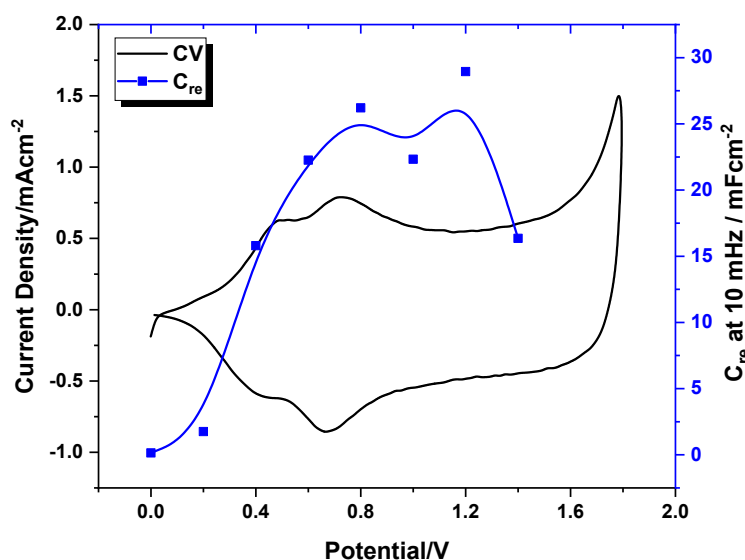

**Figure S1** – CV graph for P(ProDOT-Br) in 0.1 M Et<sub>4</sub>NBF<sub>4</sub>/ACN at a scan rate of 25 mVs<sup>-1</sup> and capacitance as a function of applied potential in 0.1 M Et<sub>4</sub>NBF<sub>4</sub>/ACN extracted from capacitance Bode Plot at a low frequency of 10 mHz, from EIS measurements.

**Table S1** – Selected equivalent circuit model (ECM), comparison of the ECM parameters for ProDOT derivatives in Et<sub>4</sub>NPF<sub>6</sub>, NaClO<sub>4</sub> and Et<sub>4</sub>NBF<sub>4</sub> electrolytes.

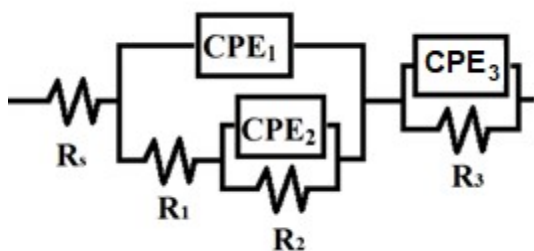

|                                                        |                                      |                                      |                          |
|--------------------------------------------------------|--------------------------------------|--------------------------------------|--------------------------|
| <b>ProDOT-Br</b>                                       | <b>Et<sub>4</sub>NPF<sub>6</sub></b> | <b>Et<sub>4</sub>NBF<sub>4</sub></b> | <b>NaClO<sub>4</sub></b> |
| <b>R<sub>s</sub>/ohm.cm<sup>2</sup></b>                | 2.10                                 | 7.57                                 | 1.58                     |
| <b>CPE<sub>1</sub>/ Ss<sup>n</sup>.cm<sup>-2</sup></b> | 1.12E-02                             | 6.39E-05                             | 3.78E-08                 |
| <b>n<sub>1</sub></b>                                   | 1.00                                 | 0.85                                 | 1.00                     |
| <b>R<sub>1</sub>/Ω.cm<sup>2</sup></b>                  | 4.34                                 | 4.14                                 | 234.43                   |
| <b>CPE<sub>2</sub>/Ss<sup>n</sup>.cm<sup>-2</sup></b>  | 1.16E-03                             | 4.98E-03                             | 2.21E-03                 |
| <b>n<sub>2</sub></b>                                   | 0.69                                 | 0.99                                 | 0.99                     |
| <b>R<sub>2</sub>/Ω.cm<sup>2</sup></b>                  | 6.56E+04                             | 4.74E+04                             | 7.11E+04                 |
| <b>Q<sub>3</sub>/Ss<sup>n</sup>.cm<sup>-2</sup></b>    | 9.24E-07                             | 1.84E-02                             | 2.36E-04                 |
| <b>n<sub>3</sub></b>                                   | 0.93                                 | 0.38                                 | 0.74                     |
| <b>R<sub>3</sub>/Ω.cm<sup>2</sup></b>                  | 12.68                                | 57.46                                | 207.27                   |
| <b>Chi squared / χ<sup>2</sup></b>                     | 1.16E-03                             | 5.75E-04                             | 4.56E-04                 |
| <b>ProDOT-OBz</b>                                      | <b>Et<sub>4</sub>NPF<sub>6</sub></b> | <b>Et<sub>4</sub>NBF<sub>4</sub></b> | <b>NaClO<sub>4</sub></b> |
| <b>R<sub>s</sub>/Ω.cm<sup>2</sup></b>                  | 3.57                                 | 5.84                                 | 7.09                     |
| <b>CPE<sub>1</sub>/ Ss<sup>n</sup>.cm<sup>-2</sup></b> | 8.48E-03                             | 7.66E-03                             | 4.91E-05                 |
| <b>n<sub>1</sub></b>                                   | 1.00                                 | 1.00                                 | 0.86                     |
| <b>R<sub>1</sub>/Ω.cm<sup>2</sup></b>                  | 1.17E+01                             | 7.44E+02                             | 2.08E+03                 |
| <b>CPE<sub>2</sub>/Ss<sup>n</sup>.cm<sup>-2</sup></b>  | 1.04E-02                             | 7.45E-04                             | 1.45E-03                 |
| <b>n<sub>2</sub></b>                                   | 1.00                                 | 1.00                                 | 0.99                     |
| <b>R<sub>2</sub>/Ω.cm<sup>2</sup></b>                  | 8.61E+03                             | 1.65E+05                             | 7.68E+05                 |
| <b>Q<sub>3</sub>/Ss<sup>n</sup>.cm<sup>-2</sup></b>    | 2.06E-07                             | 2.34E-02                             | 1.68E-02                 |
| <b>n<sub>3</sub></b>                                   | 0.89                                 | 0.39                                 | 1.00                     |
| <b>R<sub>3</sub>/Ω.cm<sup>2</sup></b>                  | 11.87                                | 151.98                               | 110.69                   |
| <b>Chi squared / χ<sup>2</sup></b>                     | 2.86E-03                             | 3.50E-04                             | 9.64E-04                 |
| <b>ProDOT-OPh</b>                                      | <b>Et<sub>4</sub>NPF<sub>6</sub></b> | <b>Et<sub>4</sub>NBF<sub>4</sub></b> | <b>NaClO<sub>4</sub></b> |
| <b>R<sub>s</sub>/Ω.cm<sup>2</sup></b>                  | 8.05                                 | 3.52                                 | 2.96                     |
| <b>CPE<sub>1</sub>/ Ss<sup>n</sup>.cm<sup>-2</sup></b> | 4.18E-03                             | 1.86E-07                             | 7.14E-08                 |
| <b>n<sub>1</sub></b>                                   | 3.33E-01                             | 9.60E-01                             | 9.90E-01                 |
| <b>R<sub>1</sub>/Ω.cm<sup>2</sup></b>                  | 59.50                                | 8.16                                 | 9.34                     |
| <b>CPE<sub>2</sub>/Ss<sup>n</sup>.cm<sup>-2</sup></b>  | 1.47E-03                             | 3.62E-03                             | 1.02E-04                 |
| <b>n<sub>2</sub></b>                                   | 0.67                                 | 1.00                                 | 0.77                     |
| <b>R<sub>2</sub>/Ω.cm<sup>2</sup></b>                  | 5.02E+04                             | 2.04E+04                             | 1.70E+04                 |
| <b>Q<sub>3</sub>/Ss<sup>n</sup>.cm<sup>-2</sup></b>    | 1.82E-02                             | 4.28E-04                             | 1.37E-04                 |
| <b>n<sub>3</sub></b>                                   | 1.00                                 | 0.63                                 | 0.76                     |
| <b>R<sub>3</sub>/Ω.cm<sup>2</sup></b>                  | 1.31E+05                             | 9.58E+02                             | 2.77E+04                 |
| <b>Chi squared / χ<sup>2</sup></b>                     | 2.29E-03                             | 3.82E-03                             | 1.47E-03                 |
| <b>ProDOT-OTs</b>                                      | <b>Et<sub>4</sub>NPF<sub>6</sub></b> | <b>Et<sub>4</sub>NBF<sub>4</sub></b> | <b>NaClO<sub>4</sub></b> |
| <b>R<sub>s</sub>/Ω.cm<sup>2</sup></b>                  | 10.40                                | 6.19                                 | 2.39                     |
| <b>CPE<sub>1</sub>/ Ss<sup>n</sup>.cm<sup>-2</sup></b> | 3.92E-06                             | 7.70E-5                              | 9.36E-08                 |
| <b>n<sub>1</sub></b>                                   | 1.00                                 | 0.81                                 | 1.00                     |
| <b>R<sub>1</sub>/Ω.cm<sup>2</sup></b>                  | 3.75                                 | 37.99                                | 884.85                   |
| <b>CPE<sub>2</sub>/Ss<sup>n</sup>.cm<sup>-2</sup></b>  | 1.68E-03                             | 3.22E-03                             | 1.50E-04                 |
| <b>n<sub>2</sub></b>                                   | 0.97                                 | 1.00                                 | 0.79                     |

|                        |                                      |          |          |
|------------------------|--------------------------------------|----------|----------|
| $R_2/\Omega.cm^2$      | 4.53E+05                             | 5.87E+04 | 8.45E+02 |
| $Q_3/Ss^n.cm^{-2}$     | 1.80E-03                             | 2.38E-03 | 1.15E-03 |
| $n_3$                  | 0.77                                 | 0.66     | 1.00     |
| $R_3/\Omega.cm^2$      | 3.01E+01                             | 6.85E+01 | 1.54E+05 |
| Chi squared / $\chi^2$ | 3.82E-03                             | 2.79E-03 | 3.68E-04 |
| <b>ProDOT</b>          | <b>Et<sub>4</sub>NBF<sub>4</sub></b> |          |          |
| $R_s/\Omega.cm^2$      | 6.37                                 |          |          |
| $CPE_1/Ss^n.cm^{-2}$   | 1.90E-03                             |          |          |
| $n_1$                  | 1.00                                 |          |          |
| $R_1/ohm.cm^2$         | 5.65                                 |          |          |
| $CPE_2/Ss^n.cm^{-2}$   | 1.48E-03                             |          |          |
| $n_2$                  | 0.96                                 |          |          |
| $R_2/ohm.cm^2$         | 3.52E+04                             |          |          |
| $Q_3/Ss^n.cm^{-2}$     | 8.79E-06                             |          |          |
| $n_3$                  | 0.62                                 |          |          |
| $R_3/ohm.cm^2$         | 7.44                                 |          |          |
| Chi squared / $\chi^2$ | 1.12E-03                             |          |          |

**Table S2** –Mott-Schottky Parameters for ProDOT derivatives.

| GC/Polymer/Electrolyte                      | NA1      | EFB1 | ND1      | EFB2 |
|---------------------------------------------|----------|------|----------|------|
| ProDOT-Et <sub>4</sub> NBF <sub>4</sub>     | 2.06E+21 | 0.14 | -        | -    |
| ProDOT-Br-Et <sub>4</sub> NPF <sub>6</sub>  | 2.52E+21 | 0.33 | 8.64E+22 | 1.15 |
| ProDOT-Br-NaClO <sub>4</sub>                | 8.24E+21 | 0.93 | -        | -    |
| PoDOT-Br-Et <sub>4</sub> NBF <sub>4</sub>   | 1.59E+21 | 0.26 | -        | -    |
| ProDOT-OBz-Et <sub>4</sub> NPF <sub>6</sub> | 1.65E+21 | 0.00 | 1.23E+22 | 1.24 |
| ProDOT-OBz-NaClO <sub>4</sub>               | 7.56E+21 | 1.10 | -        | -    |
| PoDOT-OBz-Et <sub>4</sub> NBF <sub>4</sub>  | 1.90E+21 | 0.11 | 4.13E+22 | 1.17 |
| ProDOT-OTs-Et <sub>4</sub> NPF <sub>6</sub> | 1.30E+21 | 0.07 | -        | -    |
| ProDOT-OTs-NaClO <sub>4</sub>               | 4.04E+22 | 1.32 | -        | -    |
| PoDOT-OTs-Et <sub>4</sub> NBF <sub>4</sub>  | 1.39E+21 | 0.36 | -        | -    |
| ProDOT-OPh-NaClO <sub>4</sub>               | 1.53E+20 | 0.28 | -        | -    |
| GC/Polymer/Electrolyte                      | NA1      | EFB1 | NA2      | EFB2 |
| ProDOT-OPh-Et <sub>4</sub> NPF <sub>6</sub> | 1.97E+21 | 0.57 | 2.65E+22 | 2.04 |
| PoDOT-OPh-Et <sub>4</sub> NBF <sub>4</sub>  | 9.23E+20 | 1.22 | 2.39E+20 | 0.55 |
